# Supplementary material
Source: Royal Society of Chemistry journal article supplement (doi:10.1039/d5nr05265c)
Supplement: d5nr05265c1.pdf [file d5nr05265c1.pdf]

## Supporting Information

### **Carbon-encapsulated PtPd alloy electrocatalyst on single-walled carbon nanotubes for durable polymer electrolyte fuel cell**

Miftakhul Huda,<sup>a,\*</sup> Tomoya Kawahara,<sup>a</sup> Chu-Yang Yu,<sup>a</sup> Yasuyuki Sawada,<sup>b</sup> Nagahiro Saito,<sup>a,b</sup> Masaya

Kawasumi,<sup>a,b,\*</sup> Yutaka Matsuo<sup>a,b,\*</sup>

<sup>a</sup> Department of Chemical Systems Engineering, Graduate School of Engineering, Nagoya University, Nagoya 464-8603, Japan

<sup>b</sup> Institute of Materials Innovation, Institutes of Innovation for Future Society, Nagoya University, Nagoya 464-8601, Japan

\* Corresponding author:

E-mail: miftakhul.huda.j7@f.mail.nagoya-u.ac.jp, kawasumi.masaya.e1@f.mail.nagoya-u.ac.jp,  
matsuo.yutaka.h7@f.mail.nagoya-u.ac.jp

## Table of Contents

|                                                                                                                                           |     |
|-------------------------------------------------------------------------------------------------------------------------------------------|-----|
| Figure S1. TGA profiles of PtPd@C/SWCNT .....                                                                                             | S3  |
| Figure S2. High-resolution TEM (HRTEM) image and profiles of PtPd@C/SWCNT.....                                                            | S3  |
| Figure S3. EDS area mappings for PtPd@C/SWCNT .....                                                                                       | S4  |
| Figure S4. XRD measurements of commercial Pt/C and PtPd@C/SWCNT.....                                                                      | S4  |
| Figure S5. XAS measurements of PtPd@C/SWCNT and references.....                                                                           | S5  |
| Figure S6. RDE measurements of PtPd@C/SWCNT, Pt@C/SWCNT, and references.....                                                              | S6  |
| Figure S7. TEM images of Pt@C/SWCNT. ....                                                                                                 | S7  |
| Figure S8. XRD spectra of PtPd@C/SWCNT and Pt@C/SWCNT employed for RDE measurements. ....                                                 | S7  |
| Figure S9. The power density and the power density per mass of Pt generated by Pt/C and PtPd@C/SWCNT-MEA during the durability test. .... | S8  |
| Figure S10. The size distribution of PtPd alloy nanoparticles after the durability test.....                                              | S8  |
| Figure S11. EDS observation of PtPd@C/SWCNT performed after the durability test.....                                                      | S9  |
| Figure S12. HR-TEM images of PtPd@C/SWCNT obtained after the durability test.....                                                         | S9  |
| Figure S13. Single cell measurements of PtPd@C/SWCNT, Pt@C/SWCNT, and Pt/C.....                                                           | S10 |
| Figure S14. Durability test of Pt@C/SWCNT.....                                                                                            | S10 |
| Figure S15. TEM images of Pt@C/SWCNT after durability test.....                                                                           | S11 |
| Table S1. The crystallinity of SWCNT calculated from Raman spectroscopy measurements...                                                   | S11 |
| Figure S16. Cross-sectional SEM images of PtPd@C/SWCNT-MEA and Pt/C-MEA.....                                                              | S11 |
| Figure S17. Cross-sectional SEM images of Pt/C-MEA obtained after the durability test.....                                                | S12 |
| Figure S18. XPS Pd 3d spectra of PtPd@C/SWCNT catalyst.....                                                                               | S12 |

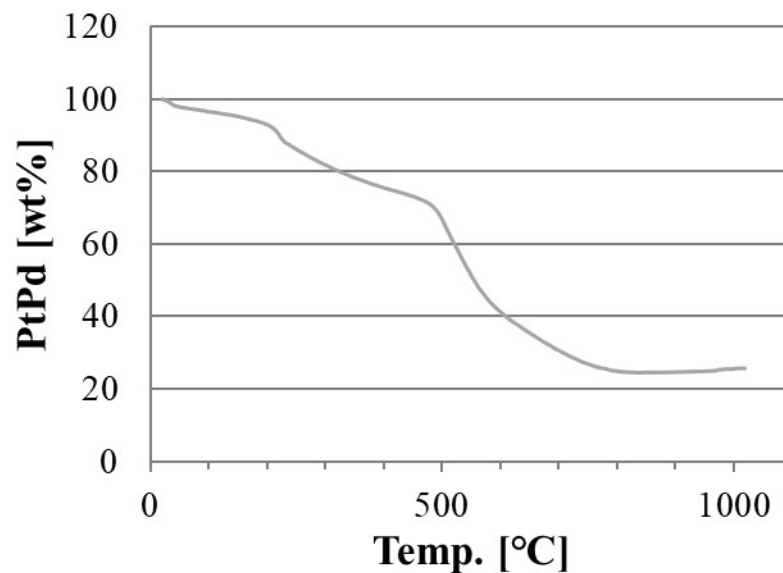

**Figure S1.** TGA profiles of PtPd@C/SWCNT.

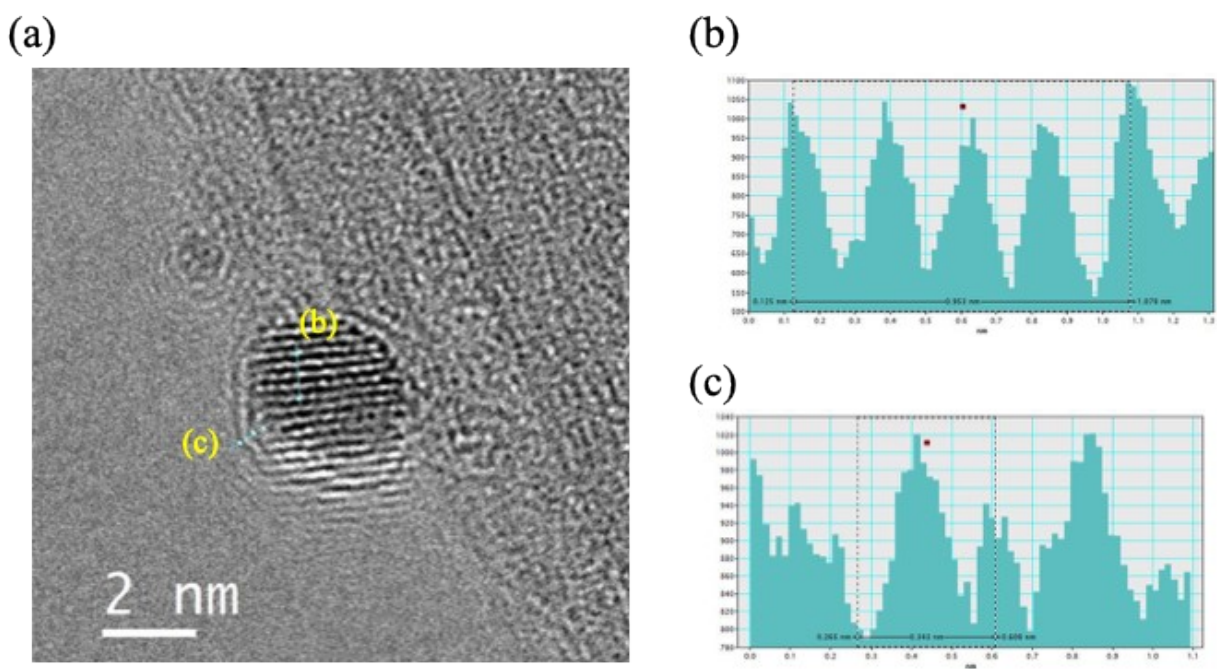

**Figure S2.** (a) High-resolution TEM (HRTEM) image and (b-c) line profiles of PtPd@C/SWCNT.

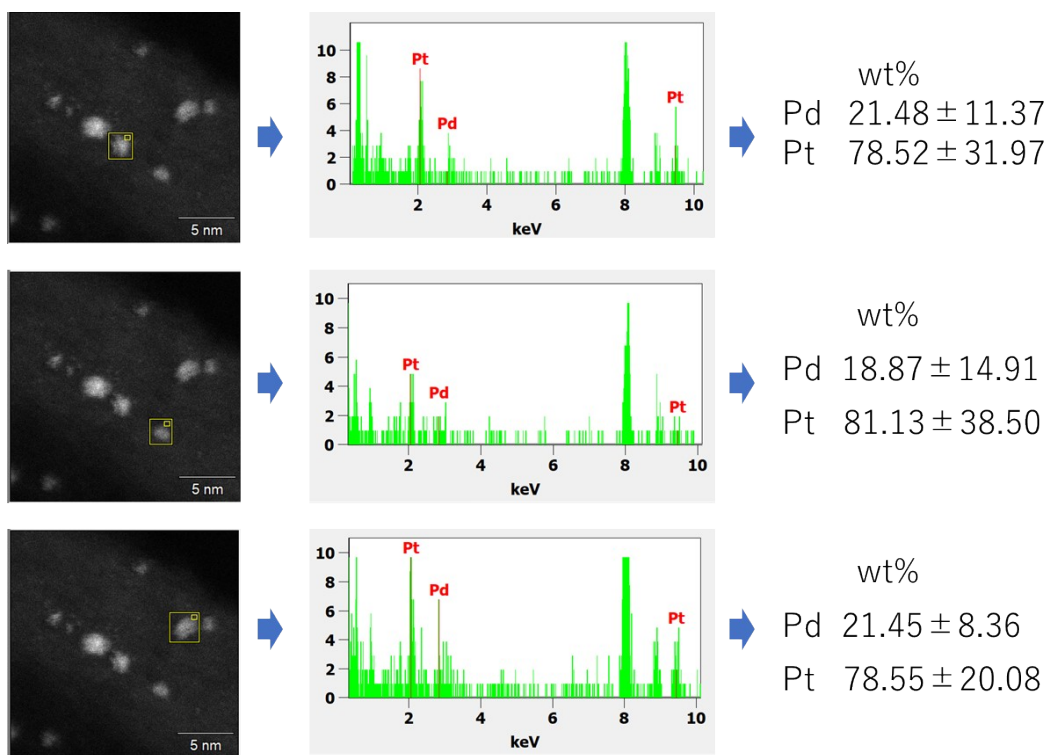

**Figure S3.** EDS area mappings for PtPd@C/SWCNT, including corresponding spectra and quantitative analysis.

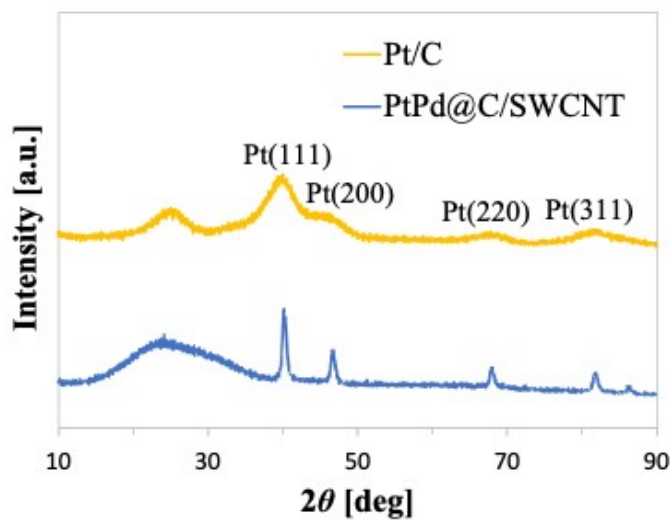

**Figure S4.** XRD measurements of commercial Pt/C and PtPd@C/SWCNT.

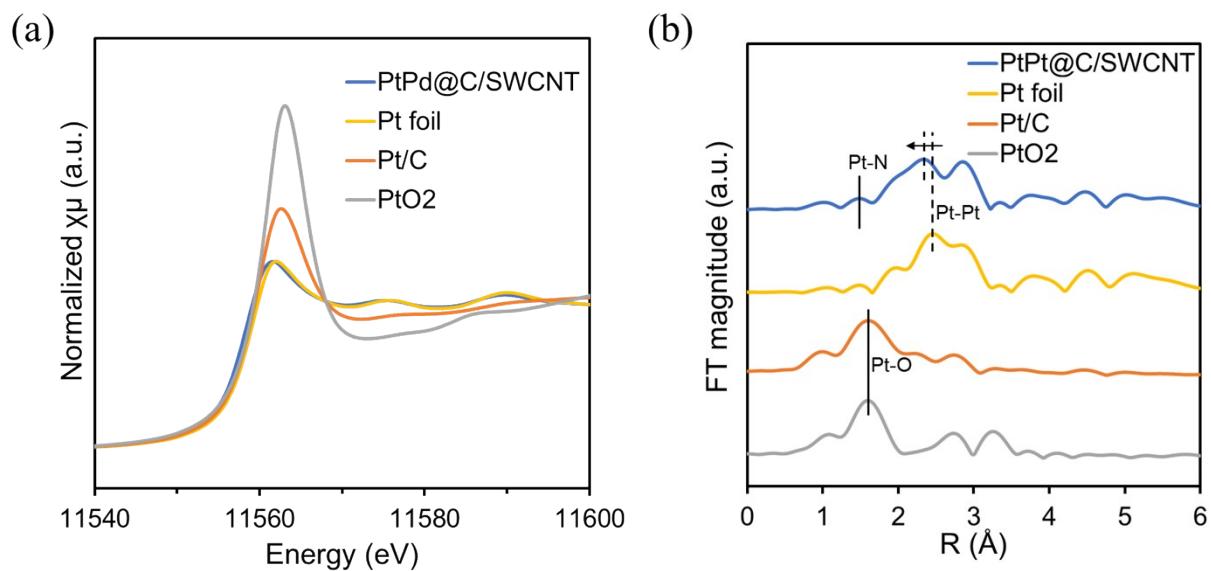

**Figure S5.** (a) XANES of Pt  $L_3$ -edge for PtPd@C/SWCNT, commercial Pt/C, and references, (e) Corresponding FT-EXFAS for PtPd@C/SWCNT, commercial Pt/C, and references.

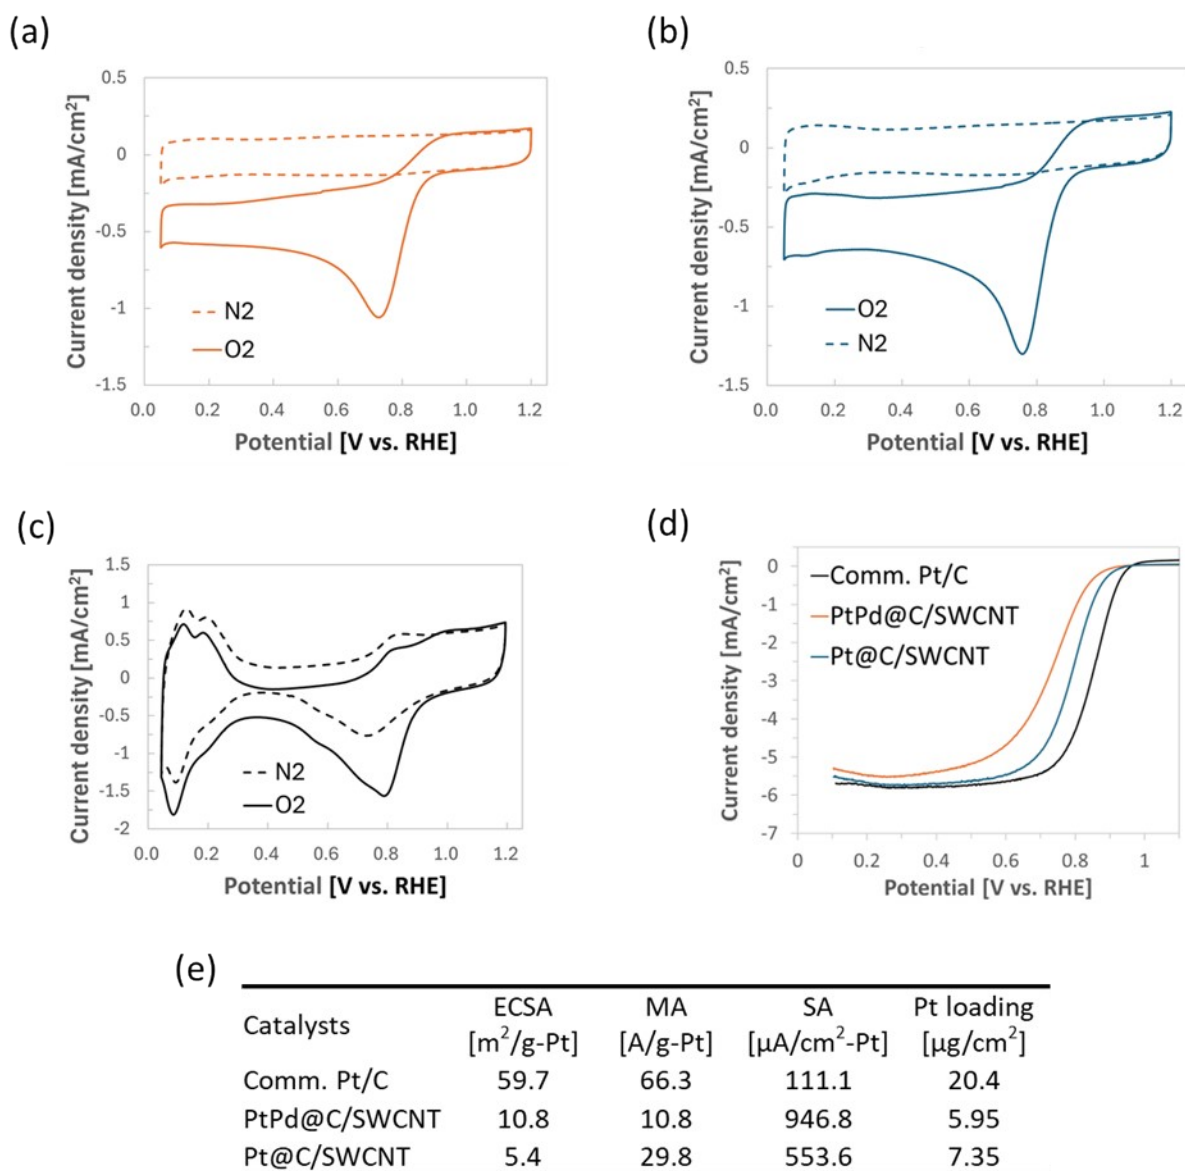

**Figure S6.** RDE measurements. CV curves of (a) PtPd@C/SWCNT, (b) Pt@C/SWCNT, and (c) commercial Pt/C. (d) LSV curves of PtPd@C/SWCNT, Pt@C/SWCNT, and Pt/C measured at 1600 rpm of electrode disk rotation. (e) Measured electrochemical performance of catalysts.

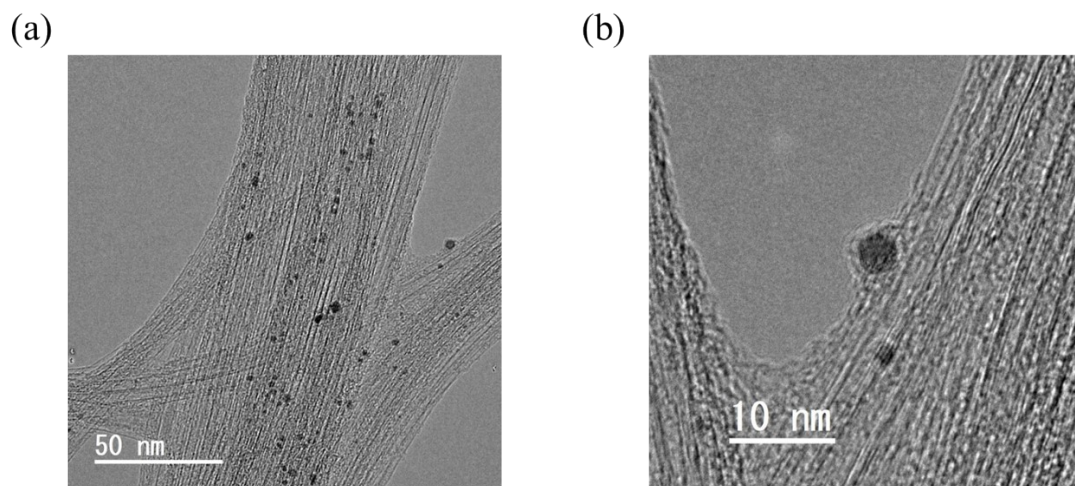

**Figure S7.** TEM images of Pt@C/SWCNT.

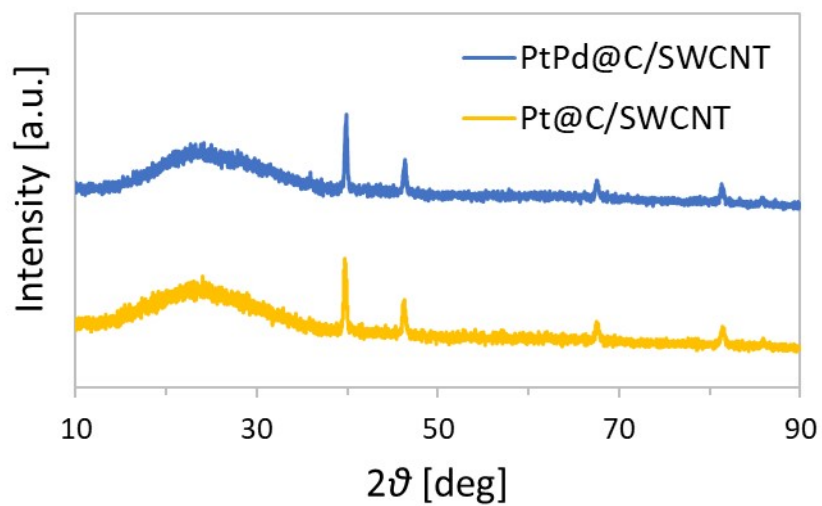

**Figure S8.** XRD spectra of PtPd@C/SWCNT and Pt@C/SWCNT employed for RDE measurements.

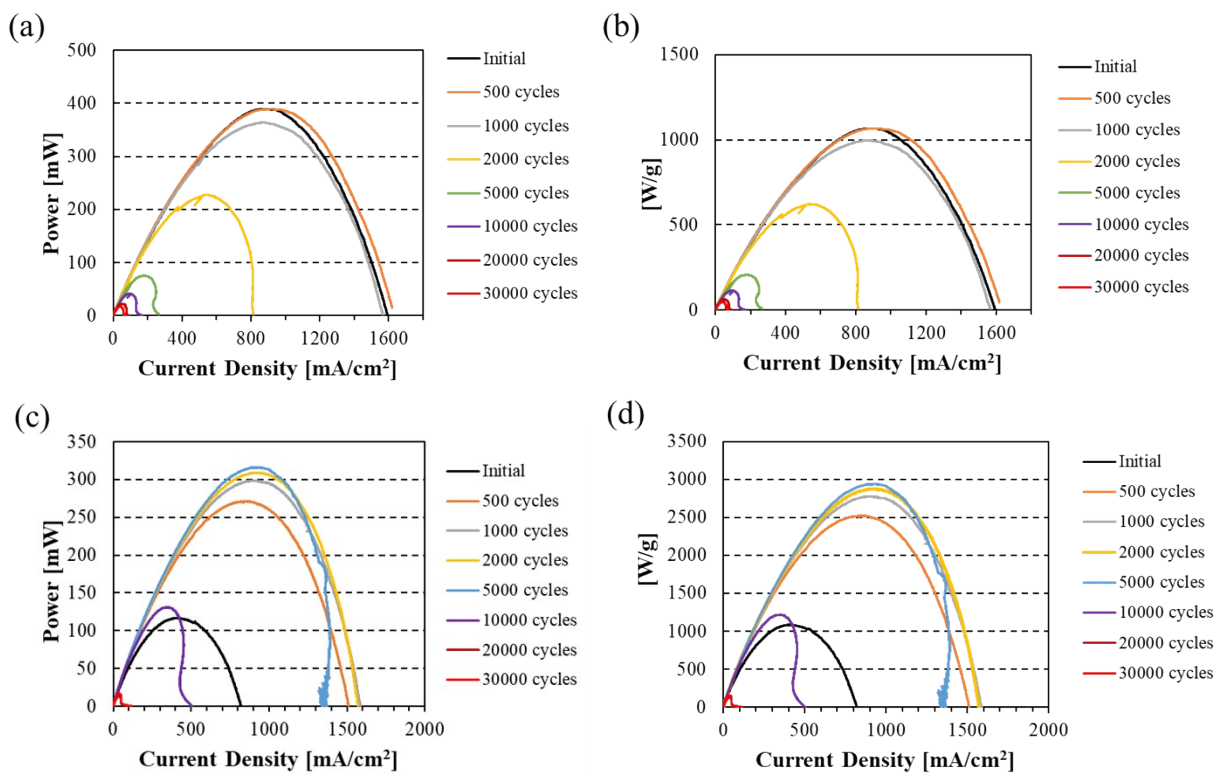

**Figure S9.** The power density and the power density per mass of Pt generated by (a,b) Pt/C and (c,d) PtPd@C/SWCNT-MEA, respectively.

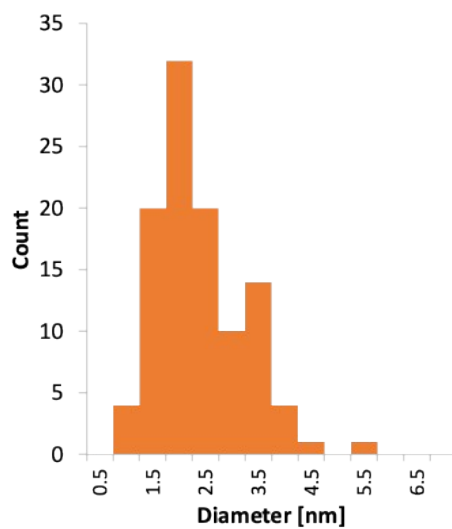

**Figure S10.** The size distribution of PtPd alloy nanoparticles after the durability test.

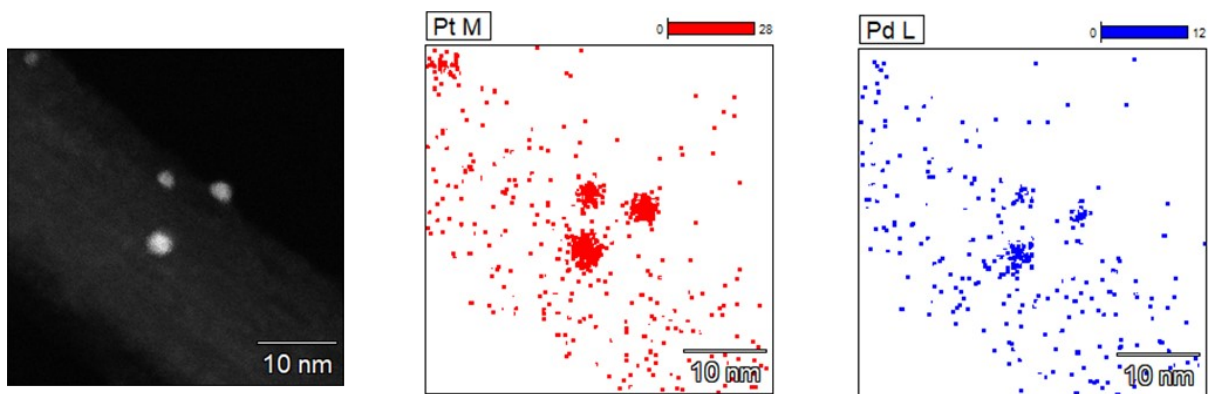

**Figure S11.** EDS observation of PtPd@C/SWCNT performed after the durability test.

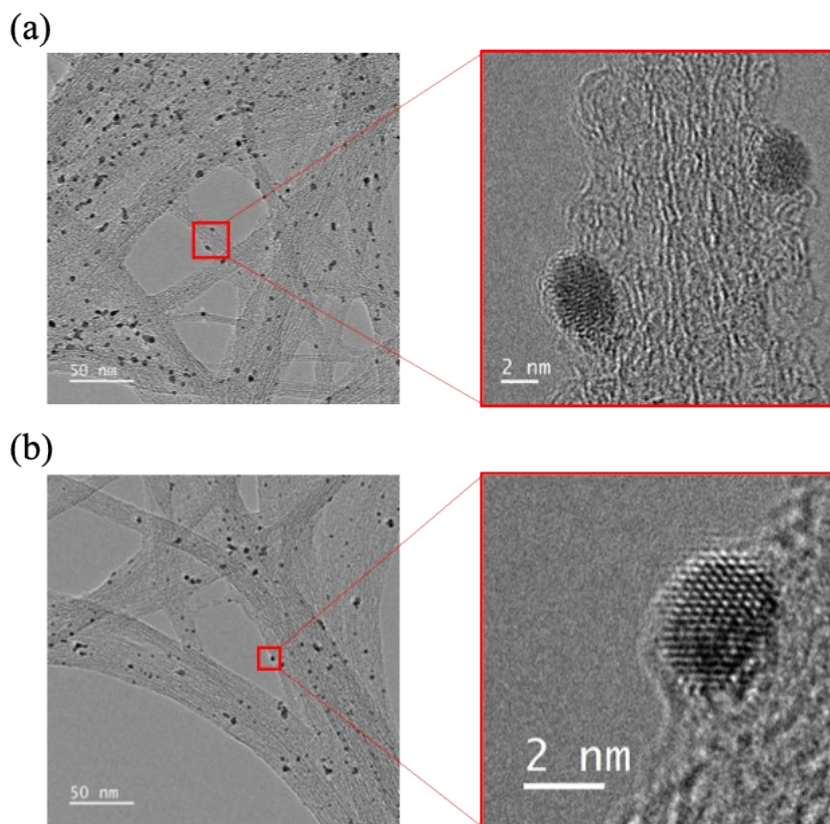

**Figure S12.** HR-TEM images of PtPd@C/SWCNT obtained after the durability test.

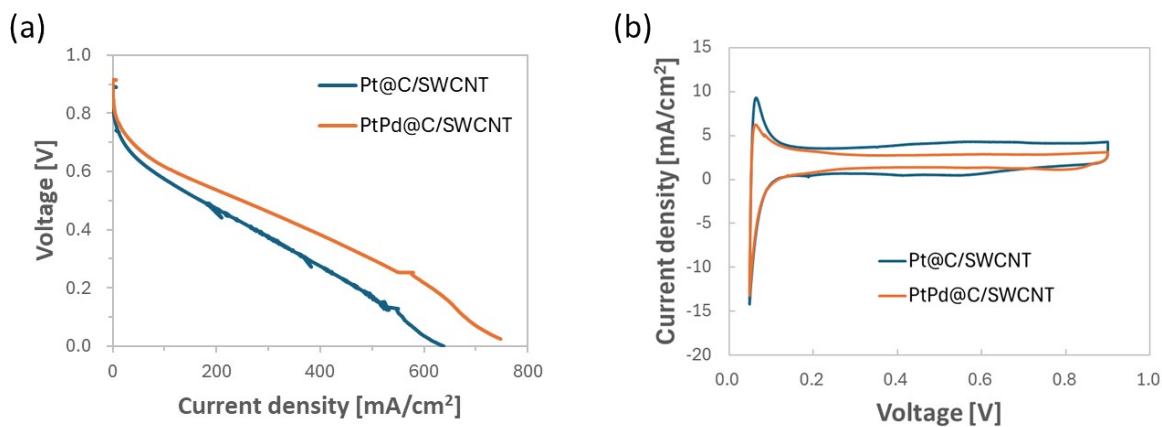

**Figure S13.** Single cell measurements. (a) I–V and (b) CV curves of MEAs with Pt@C/SWCNT (Pt loading 73  $\mu\text{g}/\text{cm}^2$ ) and PtPd@C/SWCNT (Pt loading 59  $\mu\text{g}/\text{cm}^2$ ) as cathode catalyst.

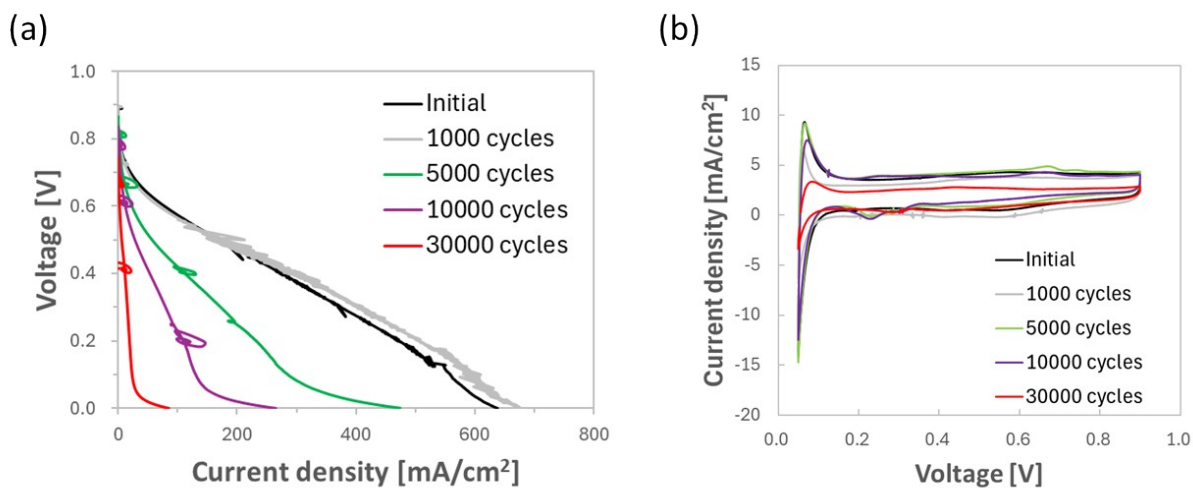

**Figure S14.** Durability test. (a) I–V and (b) CV curves of MEAs with Pt@C/SWCNT as cathode catalyst recorded during start-up/shut-down durability test.

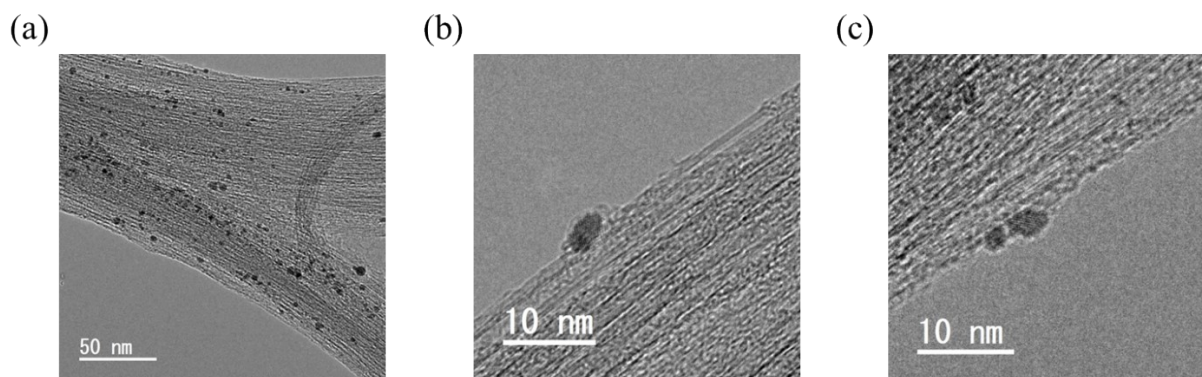

**Figure S15.** TEM images of Pt@C/SWCNT after treated with start-up/shut-down durability test of 30,000 cycles.

**Table S1.** The crystallinity of SWCNT calculated from Raman spectroscopy measurements on pristine SWCNT, PtPd@C/SWCNT before the durability test, and PtPd@C/SWCNT after the durability test, as shown in Fig. 5(a).

| Sample                                | The crystallinity of SWCNT (Id/Ig) |
|---------------------------------------|------------------------------------|
| SWCNT                                 | 0.013                              |
| PtPd@SWCNT before the durability test | 0.014                              |
| PtPd@SWCNT after the durability test  | 0.053                              |

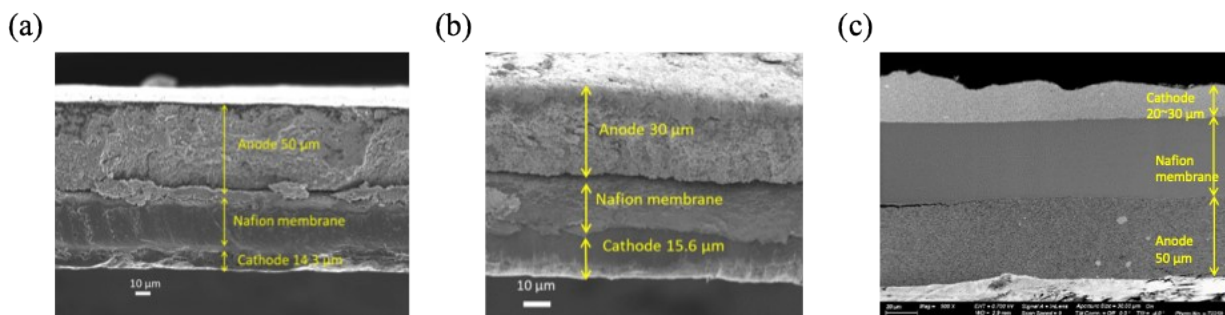

**Figure S16.** Cross-sectional scanning electron microscope (SEM) images of PtPd@C/SWCNT-MEA obtained (a) before and (b) after the durability test. (c) Cross-sectional SEM image of Pt/C-MEA obtained after the durability test.

Prior to the durability test, the structure of the cathode catalyst layer in the Pt/C-MEA was similar to that of the anode catalyst layer. This is because the anode catalyst layer was held at 0 V throughout the test, preventing any stress or corrosion.

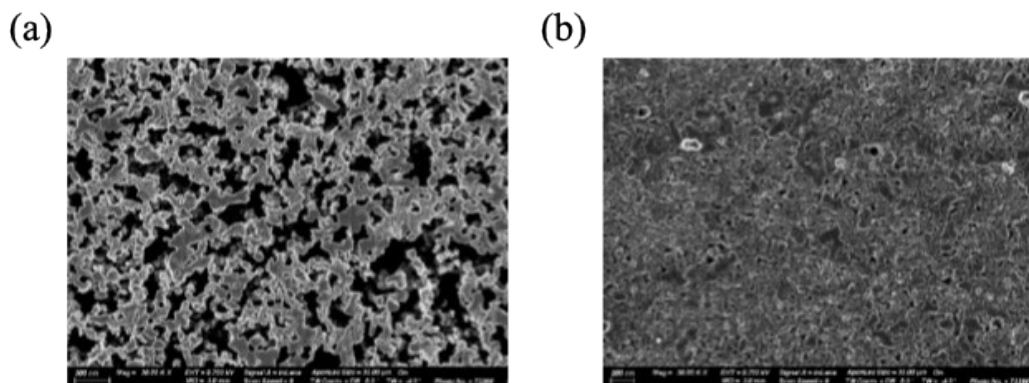

**Figure S17.** Cross-sectional SEM images of Pt/C-MEA obtained after the durability test. (a) Anode catalyst layer, (b) cathode catalyst layer.

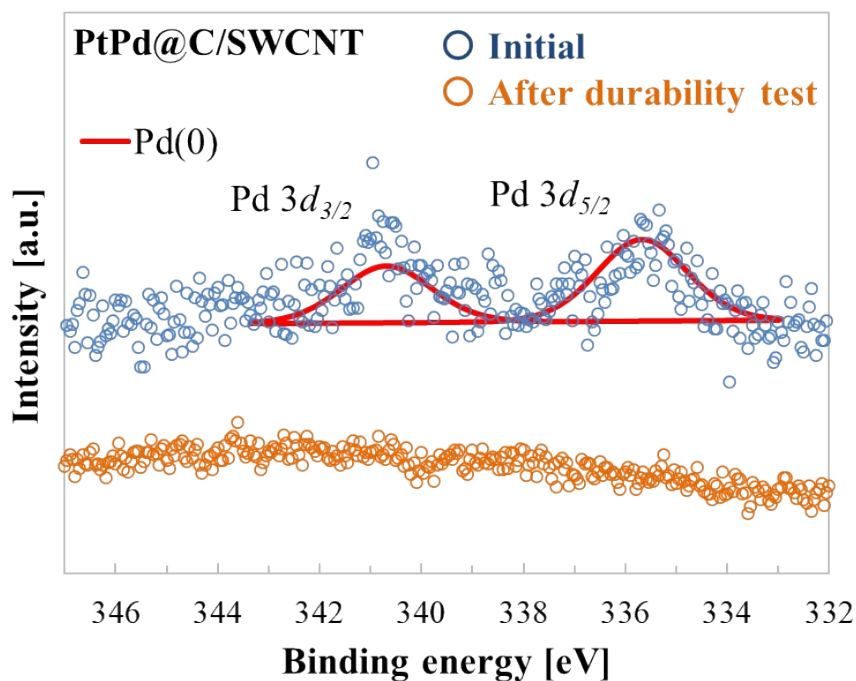

**Figure S18.** XPS Pd 3d spectra of PtPd@C/SWCNT catalyst obtained before and after the durability test.
